# Supplementary material
Source: Springer Nature journal article supplement (https://www.springermedizin.de/resource/supplementary/13048_2008_13_MOESM2_ESM.pdf/9664746)

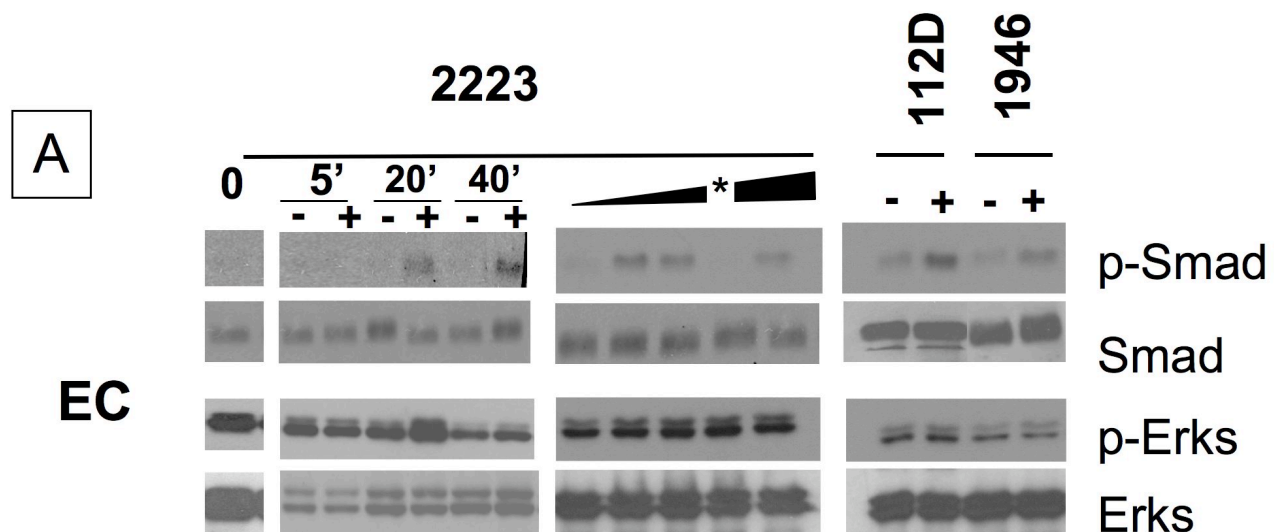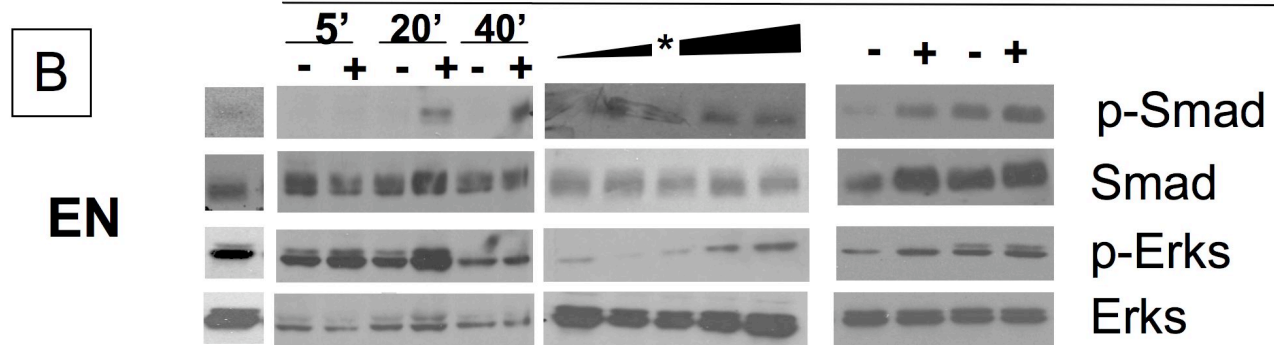

\* 0.5 mg/ml Noggin +50 ng/ml BMP-2

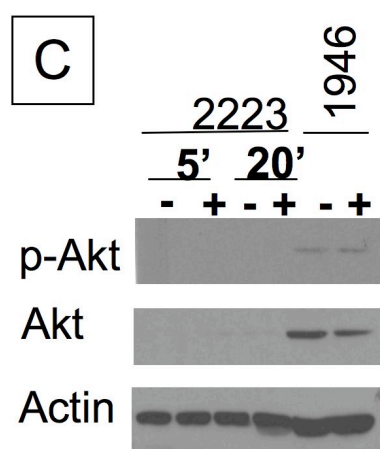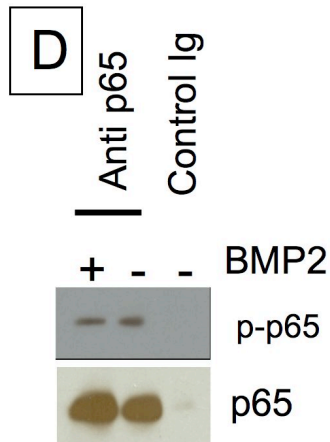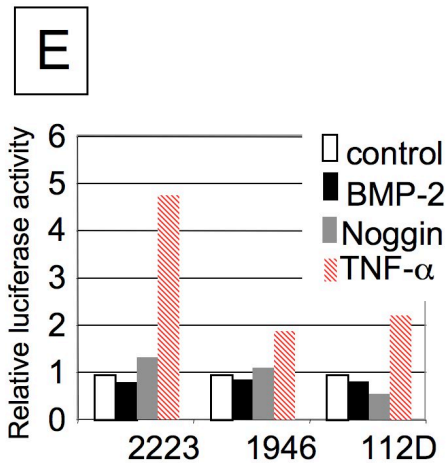

Supplement: MOESM2 [file 9664746]
